# Supplementary material for: Presence of potentially novel Helicobacter pylori-like organisms in gastric samples from cats and dogs
Source: PubMed Central journal article supplement (PMC10583413; doi:10.1186/s13567-023-01223-4), 2023-10-17
Supplement: 13567_2023_1223_MOESM2_ESM.pdf [file 13567_2023_1223_MOESM2_ESM.pdf]

| Description                                                                                              | Scientific Name                                 | Max Score | Total Score | Query Cover | E value | Per. Ident | Acc. Len | Accession                  |
|----------------------------------------------------------------------------------------------------------|-------------------------------------------------|-----------|-------------|-------------|---------|------------|----------|----------------------------|
| <a href="#">Helicobacter pylori strain G-Mx-2003-108 chromosome</a>                                      | <a href="#">Helicobacter pylori</a>             | 97.1      | 97.1        | 100%        | 2e-16   | 95.16%     | 1667946  | <a href="#">CP032044.1</a> |
| <a href="#">Helicobacter pylori strain G-Mx-2006-152 chromosome</a>                                      | <a href="#">Helicobacter pylori</a>             | 97.1      | 97.1        | 100%        | 2e-16   | 95.16%     | 1613306  | <a href="#">CP032040.1</a> |
| <a href="#">Helicobacter pylori DNA, complete genome, strain: PMSS1</a>                                  | <a href="#">Helicobacter pylori</a>             | 97.1      | 97.1        | 95%         | 2e-16   | 96.61%     | 1603093  | <a href="#">AP017633.1</a> |
| <a href="#">Helicobacter pylori strain FDAARGOS_300 chromosome, complete genome</a>                      | <a href="#">Helicobacter pylori</a>             | 97.1      | 97.1        | 100%        | 2e-16   | 95.16%     | 1645738  | <a href="#">CP027404.1</a> |
| <a href="#">Helicobacter pylori SS1, complete genome</a>                                                 | <a href="#">Helicobacter pylori SS1</a>         | 97.1      | 97.1        | 100%        | 2e-16   | 95.16%     | 1619098  | <a href="#">CP009259.1</a> |
| <a href="#">Helicobacter pylori strain PMSS1 complete genome</a>                                         | <a href="#">Helicobacter pylori PMSS1</a>       | 97.1      | 97.1        | 100%        | 2e-16   | 95.16%     | 1618480  | <a href="#">CP018823.1</a> |
| <a href="#">Helicobacter pylori J99, complete genome</a>                                                 | <a href="#">Helicobacter pylori J99</a>         | 97.1      | 97.1        | 100%        | 2e-16   | 95.16%     | 1698366  | <a href="#">CP011330.1</a> |
| <a href="#">Helicobacter pylori strain oh1 chromosome</a>                                                | <a href="#">Helicobacter pylori</a>             | 97.1      | 97.1        | 100%        | 2e-16   | 95.16%     | 1600023  | <a href="#">CP109885.1</a> |
| <a href="#">Helicobacter pylori strain J99 derivative isolate C2 adapted chromosome, complete genome</a> | <a href="#">Helicobacter pylori</a>             | 97.1      | 97.1        | 100%        | 2e-16   | 95.16%     | 1653204  | <a href="#">CP089284.1</a> |
| <a href="#">Helicobacter pylori strain J99 derivative isolate D1 chromosome, complete genome</a>         | <a href="#">Helicobacter pylori</a>             | 97.1      | 97.1        | 100%        | 2e-16   | 95.16%     | 1685094  | <a href="#">CP089283.1</a> |
| <a href="#">Helicobacter pylori strain LIM-009 chromosome, complete genome</a>                           | <a href="#">Helicobacter pylori</a>             | 97.1      | 97.1        | 100%        | 2e-16   | 95.16%     | 1618010  | <a href="#">CP051534.1</a> |
| <a href="#">Helicobacter pylori strain 603T phosphoglucosamine mutase (glmM), gene, partial cds</a>      | <a href="#">Helicobacter pylori</a>             | 97.1      | 97.1        | 100%        | 2e-16   | 95.16%     | 555      | <a href="#">JN390578.1</a> |
| <a href="#">Helicobacter pylori strain 600T phosphoglucosamine mutase (glmM), gene, partial cds</a>      | <a href="#">Helicobacter pylori</a>             | 97.1      | 97.1        | 100%        | 2e-16   | 95.16%     | 555      | <a href="#">JN390576.1</a> |
| <a href="#">Helicobacter pylori strain 595T phosphoglucosamine mutase (glmM), gene, partial cds</a>      | <a href="#">Helicobacter pylori</a>             | 97.1      | 97.1        | 100%        | 2e-16   | 95.16%     | 555      | <a href="#">JN390574.1</a> |
| <a href="#">Helicobacter pylori strain 590T phosphoglucosamine mutase (glmM), gene, partial cds</a>      | <a href="#">Helicobacter pylori</a>             | 97.1      | 97.1        | 100%        | 2e-16   | 95.16%     | 555      | <a href="#">JN390573.1</a> |
| <a href="#">Helicobacter pylori strain 370H phosphoglucosamine mutase (glmM), gene, partial cds</a>      | <a href="#">Helicobacter pylori</a>             | 97.1      | 97.1        | 100%        | 2e-16   | 95.16%     | 555      | <a href="#">JN390551.1</a> |
| <a href="#">Helicobacter pylori Gambia94/24, complete genome</a>                                         | <a href="#">Helicobacter pylori Gambia94/24</a> | 97.1      | 97.1        | 100%        | 2e-16   | 95.16%     | 1709911  | <a href="#">CP002332.1</a> |
| <a href="#">Helicobacter pylori strain PP37A1 phosphoglucosamine</a>                                     | <a href="#">Helicobacter pylori</a>             | 97.1      | 97.1        | 100%        | 2e-16   | 95.16%     | 555      | <a href="#">GU045999.1</a> |

| Description                                                                                           | Scientific Name                         | Max Score | Total Score | Query Cover | E value | Per. Ident | Acc. Len | Accession                  |
|-------------------------------------------------------------------------------------------------------|-----------------------------------------|-----------|-------------|-------------|---------|------------|----------|----------------------------|
| <a href="#">mutase (glmM) gene, partial cds</a>                                                       |                                         |           |             |             |         |            |          |                            |
| <a href="#">Helicobacter pylori strain S23 phosphoglucosamine mutase (glmM) gene, partial cds</a>     | <a href="#">Helicobacter pylori</a>     | 97.1      | 97.1        | 100%        | 2e-16   | 95.16%     | 555      | <a href="#">GU045994.1</a> |
| <a href="#">Helicobacter pylori strain PS148C1 phosphoglucosamine mutase (glmM) gene, partial cds</a> | <a href="#">Helicobacter pylori</a>     | 97.1      | 97.1        | 100%        | 2e-16   | 95.16%     | 555      | <a href="#">GU045991.1</a> |
| <a href="#">Helicobacter pylori J99, complete genome</a>                                              | <a href="#">Helicobacter pylori J99</a> | 97.1      | 97.1        | 100%        | 2e-16   | 95.16%     | 1643831  | <a href="#">AE001439.1</a> |
| <a href="#">Helicobacter pylori strain JF80 phosphoglucosamine mutase (glmM) gene, partial cds</a>    | <a href="#">Helicobacter pylori</a>     | 97.1      | 97.1        | 100%        | 2e-16   | 95.16%     | 591      | <a href="#">AY152929.1</a> |
| <a href="#">Helicobacter pylori strain PP39A1 phosphoglucosamine mutase (glmM) gene, partial cds</a>  | <a href="#">Helicobacter pylori</a>     | 97.1      | 97.1        | 100%        | 2e-16   | 95.16%     | 591      | <a href="#">AY152913.1</a> |
| <a href="#">Helicobacter pylori strain PS56C phosphoglucosamine mutase (glmM) gene, partial cds</a>   | <a href="#">Helicobacter pylori</a>     | 97.1      | 97.1        | 100%        | 2e-16   | 95.16%     | 591      | <a href="#">AY152896.1</a> |
| <a href="#">Helicobacter pylori strain S57 phosphoglucosamine mutase (glmM) gene, partial cds</a>     | <a href="#">Helicobacter pylori</a>     | 97.1      | 97.1        | 100%        | 2e-16   | 95.16%     | 591      | <a href="#">AY152893.1</a> |
| <a href="#">Helicobacter pylori strain S55 phosphoglucosamine mutase (glmM) gene, partial cds</a>     | <a href="#">Helicobacter pylori</a>     | 97.1      | 97.1        | 100%        | 2e-16   | 95.16%     | 591      | <a href="#">AY152892.1</a> |
| <a href="#">Helicobacter pylori isolate HE93/10_v1 genome assembly, chromosome: I</a>                 | <a href="#">Helicobacter pylori</a>     | 93.5      | 93.5        | 88%         | 2e-15   | 98.15%     | 1682800  | <a href="#">LT838273.1</a> |
| <a href="#">Helicobacter pylori isolate BCM-300 genome assembly, chromosome: I</a>                    | <a href="#">Helicobacter pylori</a>     | 93.5      | 93.5        | 88%         | 2e-15   | 98.15%     | 1667883  | <a href="#">LT837687.1</a> |
| <a href="#">Helicobacter pylori isolate HE142/09 genome assembly, chromosome: I</a>                   | <a href="#">Helicobacter pylori</a>     | 93.5      | 93.5        | 88%         | 2e-15   | 98.15%     | 1667936  | <a href="#">LT635478.1</a> |
| <a href="#">Helicobacter pylori isolate HE147/09 genome assembly, chromosome: I</a>                   | <a href="#">Helicobacter pylori</a>     | 93.5      | 93.5        | 88%         | 2e-15   | 98.15%     | 1667712  | <a href="#">LT635477.1</a> |
| <a href="#">Helicobacter pylori isolate HE134/09 genome assembly, chromosome: I</a>                   | <a href="#">Helicobacter pylori</a>     | 93.5      | 93.5        | 88%         | 2e-15   | 98.15%     | 1667858  | <a href="#">LT635476.1</a> |
| <a href="#">Helicobacter pylori isolate HE171/09 genome assembly, chromosome: I</a>                   | <a href="#">Helicobacter pylori</a>     | 93.5      | 93.5        | 88%         | 2e-15   | 98.15%     | 1667625  | <a href="#">LT635474.1</a> |
| <a href="#">Helicobacter pylori isolate HE136/09 genome assembly, chromosome: I</a>                   | <a href="#">Helicobacter pylori</a>     | 93.5      | 93.5        | 88%         | 2e-15   | 98.15%     | 1667978  | <a href="#">LT635473.1</a> |
| <a href="#">Helicobacter pylori isolate HE170/09 genome assembly, chromosome: I</a>                   | <a href="#">Helicobacter pylori</a>     | 93.5      | 93.5        | 88%         | 2e-15   | 98.15%     | 1670321  | <a href="#">LT635472.1</a> |

| Description                                                                                                                 | Scientific Name                                                                       | Max Score | Total Score | Query Cover | E value | Per. Ident | Acc. Len | Accession                  |
|-----------------------------------------------------------------------------------------------------------------------------|---------------------------------------------------------------------------------------|-----------|-------------|-------------|---------|------------|----------|----------------------------|
| <a href="#">Helicobacter pylori isolate HE141/09 genome assembly, chromosome: I</a>                                         | <a href="#">Helicobacter pylori</a>                                                   | 93.5      | 93.5        | 88%         | 2e-15   | 98.15%     | 1670384  | <a href="#">LT635471.1</a> |
| <a href="#">Helicobacter pylori isolate HE178/09 genome assembly, chromosome: I</a>                                         | <a href="#">Helicobacter pylori</a>                                                   | 93.5      | 93.5        | 88%         | 2e-15   | 98.15%     | 1667894  | <a href="#">LT635460.1</a> |
| <a href="#">Helicobacter pylori isolate HE132/09 genome assembly, chromosome: I</a>                                         | <a href="#">Helicobacter pylori</a>                                                   | 93.5      | 93.5        | 88%         | 2e-15   | 98.15%     | 1668174  | <a href="#">LT635459.1</a> |
| <a href="#">Helicobacter pylori isolate HE143/09 genome assembly, chromosome: I</a>                                         | <a href="#">Helicobacter pylori</a>                                                   | 93.5      | 93.5        | 88%         | 2e-15   | 98.15%     | 1667804  | <a href="#">LT635458.1</a> |
| <a href="#">Helicobacter pylori isolate HE101/09 genome assembly, chromosome: I</a>                                         | <a href="#">Helicobacter pylori</a>                                                   | 93.5      | 93.5        | 88%         | 2e-15   | 98.15%     | 1667821  | <a href="#">LT635456.1</a> |
| <a href="#">Helicobacter pylori strain G-Mx-2005-108 chromosome</a>                                                         | <a href="#">Helicobacter pylori</a>                                                   | 91.6      | 91.6        | 100%        | 8e-15   | 93.55%     | 1654849  | <a href="#">CP032042.1</a> |
| <a href="#">Helicobacter pylori strain G-Mx-2011-124 chromosome</a>                                                         | <a href="#">Helicobacter pylori</a>                                                   | 91.6      | 91.6        | 100%        | 8e-15   | 93.55%     | 1661266  | <a href="#">CP032038.1</a> |
| <a href="#">Helicobacter pylori strain C-Mx-2011-171 chromosome</a>                                                         | <a href="#">Helicobacter pylori</a>                                                   | 91.6      | 91.6        | 100%        | 8e-15   | 93.55%     | 1645502  | <a href="#">CP032033.1</a> |
| <a href="#">Helicobacter pylori strain C-Mx-2010-8 chromosome</a>                                                           | <a href="#">Helicobacter pylori</a>                                                   | 91.6      | 91.6        | 100%        | 8e-15   | 93.55%     | 1682275  | <a href="#">CP032027.1</a> |
| <a href="#">Helicobacter pylori strain B147 chromosome, complete genome</a>                                                 | <a href="#">Helicobacter pylori</a>                                                   | 91.6      | 91.6        | 100%        | 8e-15   | 93.55%     | 1631093  | <a href="#">CP024946.1</a> |
| <a href="#">Helicobacter pylori strain B140 chromosome, complete genome</a>                                                 | <a href="#">Helicobacter pylori</a>                                                   | 91.6      | 91.6        | 100%        | 8e-15   | 93.55%     | 1726836  | <a href="#">CP024948.1</a> |
| <a href="#">Helicobacter pylori strain 24-A-EK1 chromosome, complete genome</a>                                             | <a href="#">Helicobacter pylori</a>                                                   | 91.6      | 91.6        | 100%        | 8e-15   | 93.55%     | 1659500  | <a href="#">CP032907.1</a> |
| <a href="#">Helicobacter pylori strain 478-A-EK1 chromosome, complete genome</a>                                            | <a href="#">Helicobacter pylori</a>                                                   | 91.6      | 91.6        | 100%        | 8e-15   | 93.55%     | 1628623  | <a href="#">CP032899.1</a> |
| <a href="#">Helicobacter pylori strain HP14039 chromosome, complete genome</a>                                              | <a href="#">Helicobacter pylori</a>                                                   | 91.6      | 91.6        | 100%        | 8e-15   | 93.55%     | 1678260  | <a href="#">CP034147.1</a> |
| <a href="#">Helicobacter pylori DNA, complete genome, strain: ATCC43504</a>                                                 | <a href="#">Helicobacter pylori</a>                                                   | 91.6      | 91.6        | 100%        | 8e-15   | 93.55%     | 1680829  | <a href="#">AP017632.1</a> |
| <a href="#">Helicobacter pylori strain NCTC 11637 = CCLUG 17874 = ATCC 43504 = JCM 12093 genome assembly, chromosome: 1</a> | <a href="#">Helicobacter pylori NCTC 11637 = CCLUG 17874 = ATCC 43504 = JCM 12093</a> | 91.6      | 91.6        | 100%        | 8e-15   | 93.55%     | 1680937  | <a href="#">LS483488.1</a> |
| <a href="#">Helicobacter pylori strain FDAARGOS_298 chromosome, complete genome</a>                                         | <a href="#">Helicobacter pylori</a>                                                   | 91.6      | 91.6        | 100%        | 8e-15   | 93.55%     | 1680898  | <a href="#">CP028325.1</a> |
| <a href="#">Helicobacter pylori strain 444A6 chromosome, complete genome</a>                                                | <a href="#">Helicobacter pylori</a>                                                   | 91.6      | 91.6        | 100%        | 8e-15   | 93.55%     | 1621210  | <a href="#">CP117024.1</a> |
| <a href="#">Helicobacter pylori strain K262</a>                                                                             | <a href="#">Helicobacter pylori</a>                                                   | 91.6      | 91.6        | 100%        | 8e-15   | 93.55%     | 1645008  | <a href="#">CP091772.1</a> |

| Description                                                                                          | Scientific Name                            | Max Score | Total Score | Query Cover | E value | Per. Ident | Acc. Len | Accession                  |
|------------------------------------------------------------------------------------------------------|--------------------------------------------|-----------|-------------|-------------|---------|------------|----------|----------------------------|
| <a href="#">chromosome, complete genome</a>                                                          |                                            |           |             |             |         |            |          |                            |
| <a href="#">Helicobacter pylori strain MT5118 chromosome, complete genome</a>                        | <a href="#">Helicobacter pylori</a>        | 91.6      | 91.6        | 100%        | 8e-15   | 93.55%     | 1628076  | <a href="#">CP071975.1</a> |
| <a href="#">Helicobacter pylori strain MT5125 chromosome, complete genome</a>                        | <a href="#">Helicobacter pylori</a>        | 91.6      | 91.6        | 100%        | 8e-15   | 93.55%     | 1685803  | <a href="#">CP071978.1</a> |
| <a href="#">Helicobacter pylori strain MT5111 chromosome, complete genome</a>                        | <a href="#">Helicobacter pylori</a>        | 91.6      | 91.6        | 100%        | 8e-15   | 93.55%     | 1668381  | <a href="#">CP071981.1</a> |
| <a href="#">Helicobacter pylori strain MT5135 chromosome, complete genome</a>                        | <a href="#">Helicobacter pylori</a>        | 91.6      | 91.6        | 100%        | 8e-15   | 93.55%     | 1615199  | <a href="#">CP071982.1</a> |
| <a href="#">Helicobacter pylori strain MT5114 chromosome, complete genome</a>                        | <a href="#">Helicobacter pylori</a>        | 91.6      | 91.6        | 100%        | 8e-15   | 93.55%     | 1690568  | <a href="#">CP071984.1</a> |
| <a href="#">Helicobacter pylori strain MT5119 chromosome, complete genome</a>                        | <a href="#">Helicobacter pylori</a>        | 91.6      | 91.6        | 100%        | 8e-15   | 93.55%     | 1622324  | <a href="#">CP071985.1</a> |
| <a href="#">Helicobacter pylori strain LIM-001 chromosome, complete genome</a>                       | <a href="#">Helicobacter pylori</a>        | 91.6      | 91.6        | 100%        | 8e-15   | 93.55%     | 1638284  | <a href="#">CP051541.1</a> |
| <a href="#">Helicobacter pylori strain LIM-010 chromosome, complete genome</a>                       | <a href="#">Helicobacter pylori</a>        | 91.6      | 91.6        | 100%        | 8e-15   | 93.55%     | 1745797  | <a href="#">CP051533.1</a> |
| <a href="#">Helicobacter pylori strain 584T phosphoglucosamine mutase (glmM).gene, partial cds</a>   | <a href="#">Helicobacter pylori</a>        | 91.6      | 91.6        | 100%        | 8e-15   | 93.55%     | 555      | <a href="#">JN390572.1</a> |
| <a href="#">Helicobacter pylori strain 2161N phosphoglucosamine mutase (glmM).gene, partial cds</a>  | <a href="#">Helicobacter pylori</a>        | 91.6      | 91.6        | 100%        | 8e-15   | 93.55%     | 555      | <a href="#">JN390567.1</a> |
| <a href="#">Helicobacter pylori strain 2133N phosphoglucosamine mutase (glmM).gene, partial cds</a>  | <a href="#">Helicobacter pylori</a>        | 91.6      | 91.6        | 100%        | 8e-15   | 93.55%     | 555      | <a href="#">JN390566.1</a> |
| <a href="#">Helicobacter pylori HpKE21 DNA, complete genome</a>                                      | <a href="#">Helicobacter pylori</a>        | 91.6      | 91.6        | 100%        | 8e-15   | 93.55%     | 1648327  | <a href="#">AP023320.1</a> |
| <a href="#">Helicobacter pylori SJM180, complete genome</a>                                          | <a href="#">Helicobacter pylori SJM180</a> | 91.6      | 91.6        | 100%        | 8e-15   | 93.55%     | 1658051  | <a href="#">CP002073.1</a> |
| <a href="#">Helicobacter pylori strain PP2B4 phosphoglucosamine mutase (glmM).gene, partial cds</a>  | <a href="#">Helicobacter pylori</a>        | 91.6      | 91.6        | 100%        | 8e-15   | 93.55%     | 555      | <a href="#">GU046000.1</a> |
| <a href="#">Helicobacter pylori B38 complete genome, strain B38</a>                                  | <a href="#">Helicobacter pylori B38</a>    | 91.6      | 91.6        | 100%        | 8e-15   | 93.55%     | 1576758  | <a href="#">FM991728.1</a> |
| <a href="#">Helicobacter pylori strain PP23A1 phosphoglucosamine mutase (glmM).gene, partial cds</a> | <a href="#">Helicobacter pylori</a>        | 91.6      | 91.6        | 100%        | 8e-15   | 93.55%     | 591      | <a href="#">AY152914.1</a> |
| <a href="#">Helicobacter pylori strain PP22B2 phosphoglucosamine mutase (glmM).gene, partial cds</a> | <a href="#">Helicobacter pylori</a>        | 91.6      | 91.6        | 100%        | 8e-15   | 93.55%     | 591      | <a href="#">AY152911.1</a> |

| Description                                                                                           | Scientific Name                          | Max Score | Total Score | Query Cover | E value | Per. Ident | Acc. Len | Accession                  |
|-------------------------------------------------------------------------------------------------------|------------------------------------------|-----------|-------------|-------------|---------|------------|----------|----------------------------|
| <a href="#">Helicobacter pylori strain PS184A phosphoglucosamine mutase (glmM).gene, partial cds</a>  | <a href="#">Helicobacter pylori</a>      | 91.6      | 91.6        | 100%        | 8e-15   | 93.55%     | 591      | <a href="#">AY152903.1</a> |
| <a href="#">Helicobacter pylori strain S49 phosphoglucosamine mutase (glmM).gene, partial cds</a>     | <a href="#">Helicobacter pylori</a>      | 91.6      | 91.6        | 100%        | 8e-15   | 93.55%     | 591      | <a href="#">AY152890.1</a> |
| <a href="#">Helicobacter pylori strain GCT 43 chromosome, complete genome</a>                         | <a href="#">Helicobacter pylori</a>      | 87.9      | 87.9        | 93%         | 1e-13   | 94.74%     | 1642466  | <a href="#">CP048600.1</a> |
| <a href="#">Helicobacter pylori strain C-Mx-2010-97 chromosome</a>                                    | <a href="#">Helicobacter pylori</a>      | 87.9      | 87.9        | 88%         | 1e-13   | 96.30%     | 1624459  | <a href="#">CP032036.1</a> |
| <a href="#">Helicobacter pylori strain C-Mx-2010-3 chromosome</a>                                     | <a href="#">Helicobacter pylori</a>      | 87.9      | 87.9        | 93%         | 1e-13   | 94.74%     | 1642343  | <a href="#">CP032023.1</a> |
| <a href="#">Helicobacter pylori strain C-Mx-2010-5 chromosome</a>                                     | <a href="#">Helicobacter pylori</a>      | 87.9      | 87.9        | 88%         | 1e-13   | 96.30%     | 1645840  | <a href="#">CP032022.1</a> |
| <a href="#">Helicobacter pylori strain MT5105 chromosome, complete genome</a>                         | <a href="#">Helicobacter pylori</a>      | 87.9      | 87.9        | 88%         | 1e-13   | 96.30%     | 1667928  | <a href="#">CP071977.1</a> |
| <a href="#">Helicobacter pylori strain MT5124 chromosome, complete genome</a>                         | <a href="#">Helicobacter pylori</a>      | 87.9      | 87.9        | 88%         | 1e-13   | 96.30%     | 1661144  | <a href="#">CP071986.1</a> |
| <a href="#">Helicobacter pylori strain MT5136 chromosome, complete genome</a>                         | <a href="#">Helicobacter pylori</a>      | 87.9      | 87.9        | 88%         | 1e-13   | 96.30%     | 1660636  | <a href="#">CP071987.1</a> |
| <a href="#">Helicobacter pylori strain PUNO-003 chromosome, complete genome</a>                       | <a href="#">Helicobacter pylori</a>      | 87.9      | 87.9        | 88%         | 1e-13   | 96.30%     | 1630535  | <a href="#">CP051500.1</a> |
| <a href="#">Helicobacter pylori strain PUNO-009 chromosome, complete genome</a>                       | <a href="#">Helicobacter pylori</a>      | 87.9      | 87.9        | 88%         | 1e-13   | 96.30%     | 1629514  | <a href="#">CP051495.1</a> |
| <a href="#">Helicobacter pylori 2017, complete genome</a>                                             | <a href="#">Helicobacter pylori 2017</a> | 87.9      | 87.9        | 88%         | 1e-13   | 96.30%     | 1548238  | <a href="#">CP002571.1</a> |
| <a href="#">Helicobacter pylori 2018, complete genome</a>                                             | <a href="#">Helicobacter pylori 2018</a> | 87.9      | 87.9        | 88%         | 1e-13   | 96.30%     | 1562832  | <a href="#">CP002572.1</a> |
| <a href="#">Helicobacter pylori 908, complete genome</a>                                              | <a href="#">Helicobacter pylori 908</a>  | 87.9      | 87.9        | 88%         | 1e-13   | 96.30%     | 1549666  | <a href="#">CP002184.1</a> |
| <a href="#">Helicobacter pylori strain PS184A1 phosphoglucosamine mutase (glmM).gene, partial cds</a> | <a href="#">Helicobacter pylori</a>      | 87.9      | 87.9        | 93%         | 1e-13   | 94.74%     | 555      | <a href="#">GU045992.1</a> |
| <a href="#">Helicobacter pylori strain PP25A1 phosphoglucosamine mutase (glmM).gene, partial cds</a>  | <a href="#">Helicobacter pylori</a>      | 87.9      | 87.9        | 93%         | 1e-13   | 94.74%     | 591      | <a href="#">AY152915.1</a> |
| <a href="#">Helicobacter pylori strain PP01A1 phosphoglucosamine mutase (glmM).gene, partial cds</a>  | <a href="#">Helicobacter pylori</a>      | 87.9      | 87.9        | 93%         | 1e-13   | 94.74%     | 591      | <a href="#">AY152909.1</a> |
| <a href="#">Helicobacter pylori strain PS158A1 phosphoglucosamine mutase (glmM).gene, partial cds</a> | <a href="#">Helicobacter pylori</a>      | 87.9      | 87.9        | 93%         | 1e-13   | 94.74%     | 591      | <a href="#">AY152900.1</a> |

| Description                                                                                       | Scientific Name                     | Max Score | Total Score | Query Cover | E value | Per. Ident | Acc. Len | Accession                  |
|---------------------------------------------------------------------------------------------------|-------------------------------------|-----------|-------------|-------------|---------|------------|----------|----------------------------|
| <a href="#">Helicobacter pylori strain S22 phosphoglucosamine mutase (glmM) gene, partial cds</a> | <a href="#">Helicobacter pylori</a> | 87.9      | 87.9        | 93%         | 1e-13   | 94.74%     | 591      | <a href="#">AY152885.1</a> |
| <a href="#">H.pylori urease (ureA, ureB, ureC, ureD) genes, complete cds</a>                      | <a href="#">Helicobacter pylori</a> | 87.9      | 87.9        | 93%         | 1e-13   | 94.74%     | 5100     | <a href="#">M60398.1</a>   |

### Graphic Summary

Distribution of the top 90 Blast Hits on 90 subject sequences

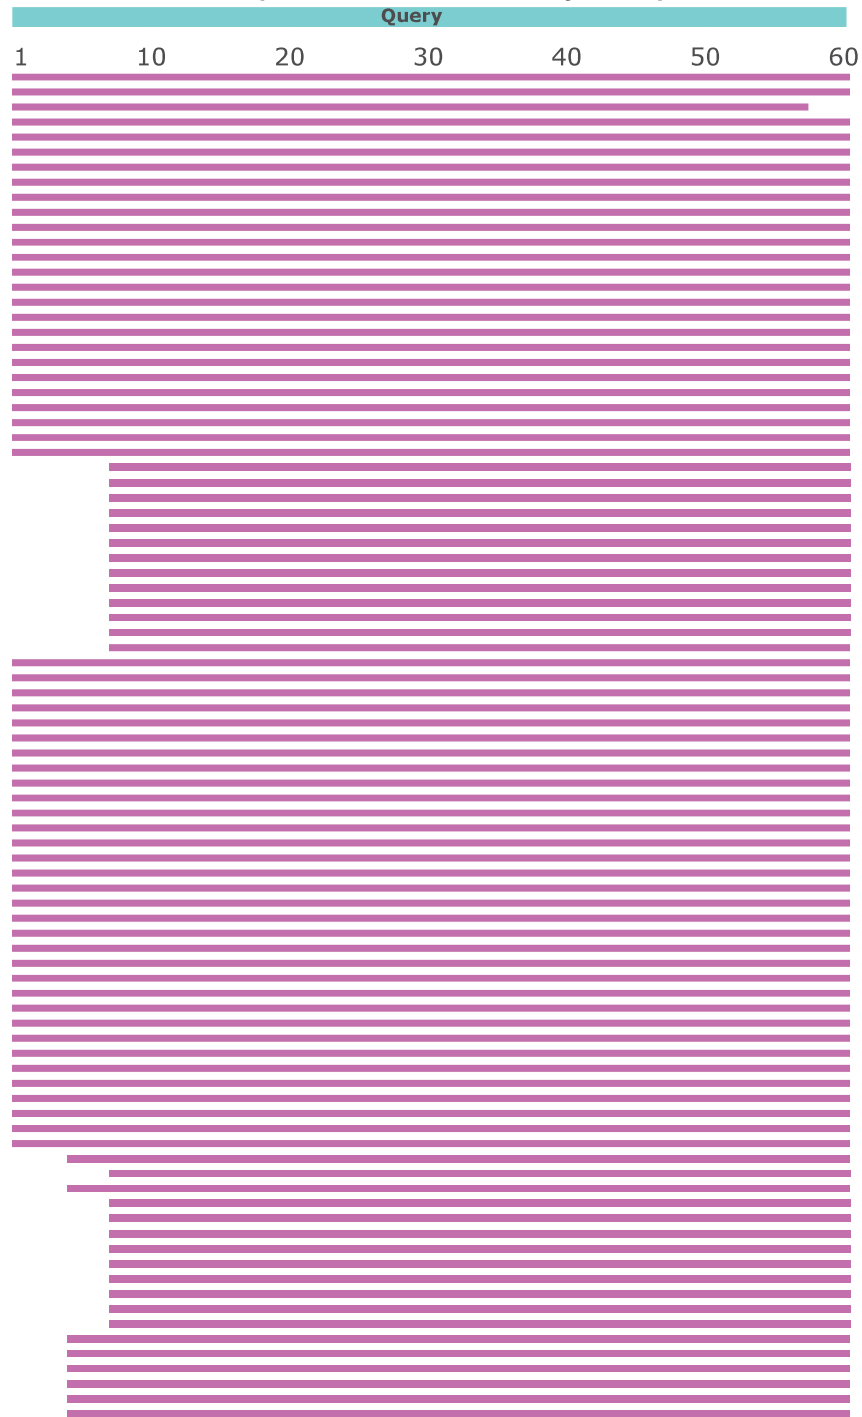

### Alignments

Alignment view Pairwise  CDS feature Restore defaults

Helicobacter pylori strain G-Mx-2003-108 chromosome  
 Sequence ID: **CP032044.1** Length: 1667946 Number of Matches: 1

Range 1: 1625821 to 1625882

| Score         | Expect                                                        | Identities | Gaps     | Strand    | Frame |
|---------------|---------------------------------------------------------------|------------|----------|-----------|-------|
| 97.1 bits(52) | 2e-16()                                                       | 59/62(95%) | 2/62(3%) | Plus/Plus |       |
| Query 1       | GTGATCC-AATAGGGCCTATGCCTACCCCTGCGATCGCATTTTTTAACCGAA-ACATGCGC | 58         |          |           |       |
| Sbjct 1625821 | GTGATCCAAATAGGGCCTATGCCTACCCCTGCGATCGCTTTTTTAACCGAAGACATGCGC  | 1625880    |          |           |       |
| Query 59      | TG 60                                                         |            |          |           |       |
| Sbjct 1625881 | TG 1625882                                                    |            |          |           |       |

Helicobacter pylori strain G-Mx-2006-152 chromosome

Sequence ID: **CP032040.1** Length: 1613306 Number of Matches: 1

Range 1: 820933 to 820994

| Score         | Expect                                                        | Identities | Gaps     | Strand    | Frame |
|---------------|---------------------------------------------------------------|------------|----------|-----------|-------|
| 97.1 bits(52) | 2e-16()                                                       | 59/62(95%) | 2/62(3%) | Plus/Plus |       |
| Query 1       | GTGATCC-AATAGGGCCTATGCCTACCCCTGCGATCGCATTTTTTAACCGAA-ACATGCGC | 58         |          |           |       |
| Sbjct 820933  | GTGATCCAAATAGGGCCTATGCCTACCCCTGCGATCGCTTTTTTAACCGAAGACATGCGC  | 820992     |          |           |       |
| Query 59      | TG 60                                                         |            |          |           |       |
| Sbjct 820993  | TG 820994                                                     |            |          |           |       |

Helicobacter pylori DNA, complete genome, strain: PMSS1

Sequence ID: **AP017633.1** Length: 1603093 Number of Matches: 1

Range 1: 1447857 to 1447915

| Score         | Expect                                                       | Identities | Gaps     | Strand    | Frame |
|---------------|--------------------------------------------------------------|------------|----------|-----------|-------|
| 97.1 bits(52) | 2e-16()                                                      | 57/59(97%) | 2/59(3%) | Plus/Plus |       |
| Query 1       | GTGATCC-AATAGGGCCTATGCCTACCCCTGCGATCGCATTTTTTAACCGAA-ACATGCG | 57         |          |           |       |
| Sbjct 1447857 | GTGATCCAAATAGGGCCTATGCCTACCCCTGCGATCGCATTTTTTAACCGAAGACATGCG | 1447915    |          |           |       |

Helicobacter pylori strain FDAARGOS\_300 chromosome, complete genome

Sequence ID: **CP027404.1** Length: 1645738 Number of Matches: 1

Range 1: 780799 to 780860

| Score         | Expect                                                        | Identities | Gaps     | Strand     | Frame |
|---------------|---------------------------------------------------------------|------------|----------|------------|-------|
| 97.1 bits(52) | 2e-16()                                                       | 59/62(95%) | 2/62(3%) | Plus/Minus |       |
| Query 1       | GTGATCC-AATAGGGCCTATGCCTACCCCTGCGATCGCATTTTTTAACCGAA-ACATGCGC | 58         |          |            |       |
| Sbjct 780860  | GTGATCCAAATAGGGCCTATGCCTACCCCTGCGATCGCTTTTTTAACCGAAGACATGCGC  | 780801     |          |            |       |
| Query 59      | TG 60                                                         |            |          |            |       |
| Sbjct 780800  | TG 780799                                                     |            |          |            |       |

Helicobacter pylori SS1, complete genome

Sequence ID: **CP009259.1** Length: 1619098 Number of Matches: 1

Range 1: 73410 to 73471

| Score         | Expect                                                        | Identities | Gaps     | Strand     | Frame |
|---------------|---------------------------------------------------------------|------------|----------|------------|-------|
| 97.1 bits(52) | 2e-16()                                                       | 59/62(95%) | 2/62(3%) | Plus/Minus |       |
| Query 1       | GTGATCC-AATAGGGCCTATGCCTACCCCTGCGATCGCATTTTTTAACCGAA-ACATGCGC | 58         |          |            |       |
| Sbjct 73471   | GTGATCCAAATAGGGCCTATGCCTACCCCTGCGATCGCATTTTTTAACCGAAGACATGCGT | 73412      |          |            |       |
| Query 59      | TG 60                                                         |            |          |            |       |
| Sbjct 73411   | TG 73410                                                      |            |          |            |       |

Helicobacter pylori strain PMSS1 complete genome

Sequence ID: **CP018823.1** Length: 1618480 Number of Matches: 1

Range 1: 73411 to 73472

| Score         | Expect                                                        | Identities | Gaps     | Strand     | Frame |
|---------------|---------------------------------------------------------------|------------|----------|------------|-------|
| 97.1 bits(52) | 2e-16()                                                       | 59/62(95%) | 2/62(3%) | Plus/Minus |       |
| Query 1       | GTGATCC-AATAGGGCCTATGCCTACCCCTGCGATCGCATTTTTTAACCGAA-ACATGCGC |            |          |            | 58    |
| Sbjct 73472   | GTGATCCAAATAGGGCCTATGCCTACCCCTGCGATCGCATTTTTTAACCGAAGACATGCGT |            |          |            | 73413 |
| Query 59      | TG 60                                                         |            |          |            |       |
| Sbjct 73412   | TG 73411                                                      |            |          |            |       |

Helicobacter pylori J99, complete genome

Sequence ID: **CP011330.1** Length: 1698366 Number of Matches: 1  
 Range 1: 978637 to 978698

| Score         | Expect                                                        | Identities | Gaps     | Strand    | Frame  |
|---------------|---------------------------------------------------------------|------------|----------|-----------|--------|
| 97.1 bits(52) | 2e-16()                                                       | 59/62(95%) | 2/62(3%) | Plus/Plus |        |
| Query 1       | GTGATCC-AATAGGGCCTATGCCTACCCCTGCGATCGCATTTTTTAACCGAA-ACATGCGC |            |          |           | 58     |
| Sbjct 978637  | GTGATCCAAATAGGGCCTATGCCTACCCCTGCGATCGCTTTTTTAACCGAAGACATGCGC  |            |          |           | 978696 |
| Query 59      | TG 60                                                         |            |          |           |        |
| Sbjct 978697  | TG 978698                                                     |            |          |           |        |

Helicobacter pylori strain oh1 chromosome

Sequence ID: **CP109885.1** Length: 1600023 Number of Matches: 1  
 Range 1: 654841 to 654902

| Score         | Expect                                                        | Identities | Gaps     | Strand     | Frame  |
|---------------|---------------------------------------------------------------|------------|----------|------------|--------|
| 97.1 bits(52) | 2e-16()                                                       | 59/62(95%) | 2/62(3%) | Plus/Minus |        |
| Query 1       | GTGATCC-AATAGGGCCTATGCCTACCCCTGCGATCGCATTTTTTAACCGAA-ACATGCGC |            |          |            | 58     |
| Sbjct 654902  | GTGATCCAAATAGGGCCTATGCCTACCCCTGCGATCGCATTTTTTAACCGAAGACATGCGT |            |          |            | 654843 |
| Query 59      | TG 60                                                         |            |          |            |        |
| Sbjct 654842  | TG 654841                                                     |            |          |            |        |

Helicobacter pylori strain J99 derivative isolate C2 adapted chromosome, complete genome

Sequence ID: **CP089284.1** Length: 1653204 Number of Matches: 1  
 Range 1: 1363293 to 1363354

| Score         | Expect                                                        | Identities | Gaps     | Strand    | Frame   |
|---------------|---------------------------------------------------------------|------------|----------|-----------|---------|
| 97.1 bits(52) | 2e-16()                                                       | 59/62(95%) | 2/62(3%) | Plus/Plus |         |
| Query 1       | GTGATCC-AATAGGGCCTATGCCTACCCCTGCGATCGCATTTTTTAACCGAA-ACATGCGC |            |          |           | 58      |
| Sbjct 1363293 | GTGATCCAAATAGGGCCTATGCCTACCCCTGCGATCGCTTTTTTAACCGAAGACATGCGC  |            |          |           | 1363352 |
| Query 59      | TG 60                                                         |            |          |           |         |
| Sbjct 1363353 | TG 1363354                                                    |            |          |           |         |

Helicobacter pylori strain J99 derivative isolate D1 chromosome, complete genome

Sequence ID: **CP089283.1** Length: 1685094 Number of Matches: 1  
 Range 1: 1106831 to 1106892

| Score         | Expect                                                        | Identities | Gaps     | Strand     | Frame   |
|---------------|---------------------------------------------------------------|------------|----------|------------|---------|
| 97.1 bits(52) | 2e-16()                                                       | 59/62(95%) | 2/62(3%) | Plus/Minus |         |
| Query 1       | GTGATCC-AATAGGGCCTATGCCTACCCCTGCGATCGCATTTTTTAACCGAA-ACATGCGC |            |          |            | 58      |
| Sbjct 1106892 | GTGATCCAAATAGGGCCTATGCCTACCCCTGCGATCGCTTTTTTAACCGAAGACATGCGC  |            |          |            | 1106833 |
| Query 59      | TG 60                                                         |            |          |            |         |
| Sbjct 1106832 | TG 1106831                                                    |            |          |            |         |



Helicobacter pylori strain LIM-009 chromosome, complete genome

Sequence ID: **CP051534.1** Length: 1618010 Number of Matches: 1

Range 1: 75738 to 75799

| Score         | Expect                                                        | Identities | Gaps     | Strand     | Frame |
|---------------|---------------------------------------------------------------|------------|----------|------------|-------|
| 97.1 bits(52) | 2e-16()                                                       | 59/62(95%) | 2/62(3%) | Plus/Minus |       |
| Query 1       | GTGATCC-AATAGGGCCTATGCCTACCCCTGCGATCGCATTTTTTAACCGAA-ACATGCGC | 58         |          |            |       |
| Sbjct 75799   | GTGATCCAAATAGGGCCTATGCCTACCCCTGCGATCGCGTTTTTAACCGAAGACATGCGC  | 75740      |          |            |       |
| Query 59      | TG 60                                                         |            |          |            |       |
| Sbjct 75739   | TG 75738                                                      |            |          |            |       |

Helicobacter pylori strain 603T phosphoglucosamine mutase (glmM) gene, partial cds

Sequence ID: **JN390578.1** Length: 555 Number of Matches: 1

Range 1: 94 to 155

| Score         | Expect                                                        | Identities | Gaps     | Strand    | Frame |
|---------------|---------------------------------------------------------------|------------|----------|-----------|-------|
| 97.1 bits(52) | 2e-16()                                                       | 59/62(95%) | 2/62(3%) | Plus/Plus |       |
| Query 1       | GTGATCC-AATAGGGCCTATGCCTACCCCTGCGATCGCATTTTTTAACCGAA-ACATGCGC | 58         |          |           |       |
| Sbjct 94      | GTGATCCAAATAGGGCCTATGCCTACCCCTGCGATCGCTTTTTTAACCGAAGACATGCGC  | 153        |          |           |       |
| Query 59      | TG 60                                                         |            |          |           |       |
| Sbjct 154     | TG 155                                                        |            |          |           |       |

Helicobacter pylori strain 600T phosphoglucosamine mutase (glmM) gene, partial cds

Sequence ID: **JN390576.1** Length: 555 Number of Matches: 1

Range 1: 94 to 155

| Score         | Expect                                                        | Identities | Gaps     | Strand    | Frame |
|---------------|---------------------------------------------------------------|------------|----------|-----------|-------|
| 97.1 bits(52) | 2e-16()                                                       | 59/62(95%) | 2/62(3%) | Plus/Plus |       |
| Query 1       | GTGATCC-AATAGGGCCTATGCCTACCCCTGCGATCGCATTTTTTAACCGAA-ACATGCGC | 58         |          |           |       |
| Sbjct 94      | GTGATCCAAATAGGGCCTATGCCTACCCCTGCGATCGCTTTTTTAACCGAAGACATGCGC  | 153        |          |           |       |
| Query 59      | TG 60                                                         |            |          |           |       |
| Sbjct 154     | TG 155                                                        |            |          |           |       |

Helicobacter pylori strain 595T phosphoglucosamine mutase (glmM) gene, partial cds

Sequence ID: **JN390574.1** Length: 555 Number of Matches: 1

Range 1: 94 to 155

| Score         | Expect                                                        | Identities | Gaps     | Strand    | Frame |
|---------------|---------------------------------------------------------------|------------|----------|-----------|-------|
| 97.1 bits(52) | 2e-16()                                                       | 59/62(95%) | 2/62(3%) | Plus/Plus |       |
| Query 1       | GTGATCC-AATAGGGCCTATGCCTACCCCTGCGATCGCATTTTTTAACCGAA-ACATGCGC | 58         |          |           |       |
| Sbjct 94      | GTGATCCAAATAGGGCCTATGCCTACCCCTGCGATCGCTTTTTTAACCGAAGACATGCGC  | 153        |          |           |       |
| Query 59      | TG 60                                                         |            |          |           |       |
| Sbjct 154     | TG 155                                                        |            |          |           |       |

Helicobacter pylori strain 590T phosphoglucosamine mutase (glmM) gene, partial cds

Sequence ID: **JN390573.1** Length: 555 Number of Matches: 1

Range 1: 94 to 155

| Score         | Expect                                                        | Identities | Gaps     | Strand    | Frame |
|---------------|---------------------------------------------------------------|------------|----------|-----------|-------|
| 97.1 bits(52) | 2e-16()                                                       | 59/62(95%) | 2/62(3%) | Plus/Plus |       |
| Query 1       | GTGATCC-AATAGGGCCTATGCCTACCCCTGCGATCGCATTTTTTAACCGAA-ACATGCGC | 58         |          |           |       |
| Sbjct 94      | GTGATCCAAATAGGGCCTATGCCTACCCCTGCGATCGCTTTTTTAACCGAAGACATGCGC  | 153        |          |           |       |
| Query 59      | TG 60                                                         |            |          |           |       |
| Sbjct 154     | TG 155                                                        |            |          |           |       |

## Taxonomy

### Reports

#### ◦ Lineage

| Organism                                                                              | Blast Name                            | Score | Number of Hits     | Description                                                                               |
|---------------------------------------------------------------------------------------|---------------------------------------|-------|--------------------|-------------------------------------------------------------------------------------------|
| <a href="#">Helicobacter</a>                                                          | <a href="#">e-<br/>proteobacteria</a> |       | <a href="#">91</a> |                                                                                           |
| <a href="#">.Helicobacter pylori</a>                                                  | <a href="#">e-<br/>proteobacteria</a> | 97.1  | <a href="#">80</a> | <a href="#">Helicobacter pylori hits</a>                                                  |
| <a href="#">.Helicobacter pylori SS1</a>                                              | <a href="#">e-<br/>proteobacteria</a> | 97.1  | <a href="#">1</a>  | <a href="#">Helicobacter pylori SS1 hits</a>                                              |
| <a href="#">.Helicobacter pylori PMSS1</a>                                            | <a href="#">e-<br/>proteobacteria</a> | 97.1  | <a href="#">1</a>  | <a href="#">Helicobacter pylori PMSS1 hits</a>                                            |
| <a href="#">.Helicobacter pylori J99</a>                                              | <a href="#">e-<br/>proteobacteria</a> | 97.1  | <a href="#">2</a>  | <a href="#">Helicobacter pylori J99 hits</a>                                              |
| <a href="#">.Helicobacter pylori Gambia94/24</a>                                      | <a href="#">e-<br/>proteobacteria</a> | 97.1  | <a href="#">1</a>  | <a href="#">Helicobacter pylori Gambia94/24 hits</a>                                      |
| <a href="#">.Helicobacter pylori NCTC 11637 = CCUG 17874 = ATCC 43504 = JCM 12093</a> | <a href="#">e-<br/>proteobacteria</a> | 91.6  | <a href="#">1</a>  | <a href="#">Helicobacter pylori NCTC 11637 = CCUG 17874 = ATCC 43504 = JCM 12093 hits</a> |
| <a href="#">.Helicobacter pylori SJM180</a>                                           | <a href="#">e-<br/>proteobacteria</a> | 91.6  | <a href="#">1</a>  | <a href="#">Helicobacter pylori SJM180 hits</a>                                           |
| <a href="#">.Helicobacter pylori B38</a>                                              | <a href="#">e-<br/>proteobacteria</a> | 91.6  | <a href="#">1</a>  | <a href="#">Helicobacter pylori B38 hits</a>                                              |
| <a href="#">.Helicobacter pylori 2017</a>                                             | <a href="#">e-<br/>proteobacteria</a> | 87.9  | <a href="#">1</a>  | <a href="#">Helicobacter pylori 2017 hits</a>                                             |
| <a href="#">.Helicobacter pylori 2018</a>                                             | <a href="#">e-<br/>proteobacteria</a> | 87.9  | <a href="#">1</a>  | <a href="#">Helicobacter pylori 2018 hits</a>                                             |
| <a href="#">.Helicobacter pylori 908</a>                                              | <a href="#">e-<br/>proteobacteria</a> | 87.9  | <a href="#">1</a>  | <a href="#">Helicobacter pylori 908 hits</a>                                              |

#### ◦ Organism

| Description                                                                                              | Score | E value | Accession                |
|----------------------------------------------------------------------------------------------------------|-------|---------|--------------------------|
| Helicobacter pylori [e-proteobacteria ]                                                                  |       |         |                          |
| <a href="#">Helicobacter pylori strain G-Mx-2003-108 chromosome</a>                                      | 97.1  | 2e-16   | <a href="#">CP032044</a> |
| <a href="#">Helicobacter pylori strain G-Mx-2006-152 chromosome</a>                                      | 97.1  | 2e-16   | <a href="#">CP032040</a> |
| <a href="#">Helicobacter pylori DNA, complete genome, strain: PMSS1</a>                                  | 97.1  | 2e-16   | <a href="#">AP017633</a> |
| <a href="#">Helicobacter pylori strain FDAARGOS_300 chromosome, complete genome</a>                      | 97.1  | 2e-16   | <a href="#">CP027404</a> |
| <a href="#">Helicobacter pylori strain oh1 chromosome</a>                                                | 97.1  | 2e-16   | <a href="#">CP109885</a> |
| <a href="#">Helicobacter pylori strain J99 derivative isolate C2 adapted chromosome, complete genome</a> | 97.1  | 2e-16   | <a href="#">CP089284</a> |
| <a href="#">Helicobacter pylori strain J99 derivative isolate D1 chromosome, complete genome</a>         | 97.1  | 2e-16   | <a href="#">CP089283</a> |
| <a href="#">Helicobacter pylori strain LIM-009 chromosome, complete genome</a>                           | 97.1  | 2e-16   | <a href="#">CP051534</a> |
| <a href="#">Helicobacter pylori strain 603T phosphoglucosamine mutase (glmM) gene, partial cds</a>       | 97.1  | 2e-16   | <a href="#">JN390578</a> |
| <a href="#">Helicobacter pylori strain 600T phosphoglucosamine mutase (glmM) gene, partial cds</a>       | 97.1  | 2e-16   | <a href="#">JN390576</a> |
| <a href="#">Helicobacter pylori strain 595T phosphoglucosamine mutase (glmM) gene, partial cds</a>       | 97.1  | 2e-16   | <a href="#">JN390574</a> |
| <a href="#">Helicobacter pylori strain 599T phosphoglucosamine mutase (glmM) gene, partial cds</a>       | 97.1  | 2e-16   | <a href="#">JN390575</a> |
| <a href="#">Helicobacter pylori strain 590T phosphoglucosamine mutase (glmM) gene, partial cds</a>       | 97.1  | 2e-16   | <a href="#">JN390573</a> |
| <a href="#">Helicobacter pylori strain 370H phosphoglucosamine mutase (glmM) gene, partial cds</a>       | 97.1  | 2e-16   | <a href="#">JN390551</a> |
| <a href="#">Helicobacter pylori strain PP37A1 phosphoglucosamine mutase (glmM) gene, partial cds</a>     | 97.1  | 2e-16   | <a href="#">GU045999</a> |
| <a href="#">Helicobacter pylori strain S23 phosphoglucosamine mutase (glmM) gene, partial cds</a>        | 97.1  | 2e-16   | <a href="#">GU045994</a> |
| <a href="#">Helicobacter pylori strain PS148C1 phosphoglucosamine mutase (glmM) gene, partial cds</a>    | 97.1  | 2e-16   | <a href="#">GU045991</a> |
| <a href="#">Helicobacter pylori strain JF80 phosphoglucosamine mutase (glmM) gene, partial cds</a>       | 97.1  | 2e-16   | <a href="#">AY152929</a> |
| <a href="#">Helicobacter pylori strain PP39A1 phosphoglucosamine mutase (glmM) gene, partial cds</a>     | 97.1  | 2e-16   | <a href="#">AY152913</a> |

| Description                                                                                          | Score | E value | Accession                |
|------------------------------------------------------------------------------------------------------|-------|---------|--------------------------|
| <a href="#">Helicobacter pylori strain PS56C phosphoglucosamine mutase (glmM) gene, partial cds</a>  | 97.1  | 2e-16   | <a href="#">AY152896</a> |
| <a href="#">Helicobacter pylori strain S57 phosphoglucosamine mutase (glmM) gene, partial cds</a>    | 97.1  | 2e-16   | <a href="#">AY152893</a> |
| <a href="#">Helicobacter pylori strain S55 phosphoglucosamine mutase (glmM) gene, partial cds</a>    | 97.1  | 2e-16   | <a href="#">AY152892</a> |
| <a href="#">Helicobacter pylori isolate HE93/10_v1 genome assembly, chromosome: I</a>                | 93.5  | 2e-15   | <a href="#">LT838273</a> |
| <a href="#">Helicobacter pylori isolate BCM-300 genome assembly, chromosome: I</a>                   | 93.5  | 2e-15   | <a href="#">LT837687</a> |
| <a href="#">Helicobacter pylori isolate HE142/09 genome assembly, chromosome: I</a>                  | 93.5  | 2e-15   | <a href="#">LT635478</a> |
| <a href="#">Helicobacter pylori isolate HE147/09 genome assembly, chromosome: I</a>                  | 93.5  | 2e-15   | <a href="#">LT635477</a> |
| <a href="#">Helicobacter pylori isolate HE134/09 genome assembly, chromosome: I</a>                  | 93.5  | 2e-15   | <a href="#">LT635476</a> |
| <a href="#">Helicobacter pylori isolate HE171/09 genome assembly, chromosome: I</a>                  | 93.5  | 2e-15   | <a href="#">LT635474</a> |
| <a href="#">Helicobacter pylori isolate HE136/09 genome assembly, chromosome: I</a>                  | 93.5  | 2e-15   | <a href="#">LT635473</a> |
| <a href="#">Helicobacter pylori isolate HE170/09 genome assembly, chromosome: I</a>                  | 93.5  | 2e-15   | <a href="#">LT635472</a> |
| <a href="#">Helicobacter pylori isolate HE141/09 genome assembly, chromosome: I</a>                  | 93.5  | 2e-15   | <a href="#">LT635471</a> |
| <a href="#">Helicobacter pylori isolate HE178/09 genome assembly, chromosome: I</a>                  | 93.5  | 2e-15   | <a href="#">LT635460</a> |
| <a href="#">Helicobacter pylori isolate HE132/09 genome assembly, chromosome: I</a>                  | 93.5  | 2e-15   | <a href="#">LT635459</a> |
| <a href="#">Helicobacter pylori isolate HE143/09 genome assembly, chromosome: I</a>                  | 93.5  | 2e-15   | <a href="#">LT635458</a> |
| <a href="#">Helicobacter pylori isolate HE101/09 genome assembly, chromosome: I</a>                  | 93.5  | 2e-15   | <a href="#">LT635456</a> |
| <a href="#">Helicobacter pylori strain G-Mx-2005-108 chromosome</a>                                  | 91.6  | 8e-15   | <a href="#">CP032042</a> |
| <a href="#">Helicobacter pylori strain G-Mx-2011-124 chromosome</a>                                  | 91.6  | 8e-15   | <a href="#">CP032038</a> |
| <a href="#">Helicobacter pylori strain C-Mx-2011-171 chromosome</a>                                  | 91.6  | 8e-15   | <a href="#">CP032033</a> |
| <a href="#">Helicobacter pylori strain C-Mx-2010-8 chromosome</a>                                    | 91.6  | 8e-15   | <a href="#">CP032027</a> |
| <a href="#">Helicobacter pylori strain B147 chromosome, complete genome</a>                          | 91.6  | 8e-15   | <a href="#">CP024946</a> |
| <a href="#">Helicobacter pylori strain B140 chromosome, complete genome</a>                          | 91.6  | 8e-15   | <a href="#">CP024948</a> |
| <a href="#">Helicobacter pylori strain 24-A-EK1 chromosome, complete genome</a>                      | 91.6  | 8e-15   | <a href="#">CP032907</a> |
| <a href="#">Helicobacter pylori strain 478-A-EK1 chromosome, complete genome</a>                     | 91.6  | 8e-15   | <a href="#">CP032899</a> |
| <a href="#">Helicobacter pylori strain HP14039 chromosome, complete genome</a>                       | 91.6  | 8e-15   | <a href="#">CP034147</a> |
| <a href="#">Helicobacter pylori DNA, complete genome, strain: ATCC43504</a>                          | 91.6  | 8e-15   | <a href="#">AP017632</a> |
| <a href="#">Helicobacter pylori strain FDAARGOS_298 chromosome, complete genome</a>                  | 91.6  | 8e-15   | <a href="#">CP028325</a> |
| <a href="#">Helicobacter pylori strain 444A6 chromosome, complete genome</a>                         | 91.6  | 8e-15   | <a href="#">CP117024</a> |
| <a href="#">Helicobacter pylori strain K262 chromosome, complete genome</a>                          | 91.6  | 8e-15   | <a href="#">CP091772</a> |
| <a href="#">Helicobacter pylori strain MT5118 chromosome, complete genome</a>                        | 91.6  | 8e-15   | <a href="#">CP071975</a> |
| <a href="#">Helicobacter pylori strain MT5125 chromosome, complete genome</a>                        | 91.6  | 8e-15   | <a href="#">CP071978</a> |
| <a href="#">Helicobacter pylori strain MT5111 chromosome, complete genome</a>                        | 91.6  | 8e-15   | <a href="#">CP071981</a> |
| <a href="#">Helicobacter pylori strain MT5135 chromosome, complete genome</a>                        | 91.6  | 8e-15   | <a href="#">CP071982</a> |
| <a href="#">Helicobacter pylori strain MT5114 chromosome, complete genome</a>                        | 91.6  | 8e-15   | <a href="#">CP071984</a> |
| <a href="#">Helicobacter pylori strain MT5119 chromosome, complete genome</a>                        | 91.6  | 8e-15   | <a href="#">CP071985</a> |
| <a href="#">Helicobacter pylori strain LIM-001 chromosome, complete genome</a>                       | 91.6  | 8e-15   | <a href="#">CP051541</a> |
| <a href="#">Helicobacter pylori strain LIM-010 chromosome, complete genome</a>                       | 91.6  | 8e-15   | <a href="#">CP051533</a> |
| <a href="#">Helicobacter pylori strain 584T phosphoglucosamine mutase (glmM) gene, partial cds</a>   | 91.6  | 8e-15   | <a href="#">JN390572</a> |
| <a href="#">Helicobacter pylori strain 2161N phosphoglucosamine mutase (glmM) gene, partial cds</a>  | 91.6  | 8e-15   | <a href="#">JN390567</a> |
| <a href="#">Helicobacter pylori strain 2133N phosphoglucosamine mutase (glmM) gene, partial cds</a>  | 91.6  | 8e-15   | <a href="#">JN390566</a> |
| <a href="#">Helicobacter pylori HpKE21 DNA, complete genome</a>                                      | 91.6  | 8e-15   | <a href="#">AP023320</a> |
| <a href="#">Helicobacter pylori strain PP2B4 phosphoglucosamine mutase (glmM) gene, partial cds</a>  | 91.6  | 8e-15   | <a href="#">GU046000</a> |
| <a href="#">Helicobacter pylori strain PP23A1 phosphoglucosamine mutase (glmM) gene, partial cds</a> | 91.6  | 8e-15   | <a href="#">AY152914</a> |
| <a href="#">Helicobacter pylori strain PP22B2 phosphoglucosamine mutase (glmM) gene, partial cds</a> | 91.6  | 8e-15   | <a href="#">AY152911</a> |
| <a href="#">Helicobacter pylori strain PS184A phosphoglucosamine mutase (glmM) gene, partial cds</a> | 91.6  | 8e-15   | <a href="#">AY152903</a> |
| <a href="#">Helicobacter pylori strain S49 phosphoglucosamine mutase (glmM) gene, partial cds</a>    | 91.6  | 8e-15   | <a href="#">AY152890</a> |
| <a href="#">Helicobacter pylori strain GCT 43 chromosome, complete genome</a>                        | 87.9  | 1e-13   | <a href="#">CP048600</a> |
| <a href="#">Helicobacter pylori strain C-Mx-2010-97 chromosome</a>                                   | 87.9  | 1e-13   | <a href="#">CP032036</a> |
| <a href="#">Helicobacter pylori strain C-Mx-2010-3 chromosome</a>                                    | 87.9  | 1e-13   | <a href="#">CP032023</a> |

| Description                                                                                           | Score | E value | Accession                |
|-------------------------------------------------------------------------------------------------------|-------|---------|--------------------------|
| <a href="#">Helicobacter pylori strain C-Mx-2010-5 chromosome</a>                                     | 87.9  | 1e-13   | <a href="#">CP032022</a> |
| <a href="#">Helicobacter pylori strain MT5105 chromosome, complete genome</a>                         | 87.9  | 1e-13   | <a href="#">CP071977</a> |
| <a href="#">Helicobacter pylori strain MT5124 chromosome, complete genome</a>                         | 87.9  | 1e-13   | <a href="#">CP071986</a> |
| <a href="#">Helicobacter pylori strain MT5136 chromosome, complete genome</a>                         | 87.9  | 1e-13   | <a href="#">CP071987</a> |
| <a href="#">Helicobacter pylori strain PUNO-003 chromosome, complete genome</a>                       | 87.9  | 1e-13   | <a href="#">CP051500</a> |
| <a href="#">Helicobacter pylori strain PUNO-009 chromosome, complete genome</a>                       | 87.9  | 1e-13   | <a href="#">CP051495</a> |
| <a href="#">Helicobacter pylori strain PS184A1 phosphoglucosamine mutase (glmM) gene, partial cds</a> | 87.9  | 1e-13   | <a href="#">GU045992</a> |
| <a href="#">Helicobacter pylori strain PP25A1 phosphoglucosamine mutase (glmM) gene, partial cds</a>  | 87.9  | 1e-13   | <a href="#">AY152915</a> |
| <a href="#">Helicobacter pylori strain PP01A1 phosphoglucosamine mutase (glmM) gene, partial cds</a>  | 87.9  | 1e-13   | <a href="#">AY152909</a> |
| <a href="#">Helicobacter pylori strain PS158A1 phosphoglucosamine mutase (glmM) gene, partial cds</a> | 87.9  | 1e-13   | <a href="#">AY152900</a> |
| <a href="#">Helicobacter pylori strain S22 phosphoglucosamine mutase (glmM) gene, partial cds</a>     | 87.9  | 1e-13   | <a href="#">AY152885</a> |
| <a href="#">H.pylori urease (ureA, ureB, ureC, ureD) genes, complete cds</a>                          | 87.9  | 1e-13   | <a href="#">M60398</a>   |
| Helicobacter pylori SS1 [e-proteobacteria ]                                                           |       |         |                          |
| <a href="#">Helicobacter pylori SS1, complete genome</a>                                              | 97.1  | 2e-16   | <a href="#">CP009259</a> |
| Helicobacter pylori PMSS1 [e-proteobacteria ]                                                         |       |         |                          |
| <a href="#">Helicobacter pylori strain PMSS1 complete genome</a>                                      | 97.1  | 2e-16   | <a href="#">CP018823</a> |
| Helicobacter pylori J99 [e-proteobacteria ]                                                           |       |         |                          |
| <a href="#">Helicobacter pylori J99, complete genome</a>                                              | 97.1  | 2e-16   | <a href="#">CP011330</a> |
| <a href="#">Helicobacter pylori J99, complete genome</a>                                              | 97.1  | 2e-16   | <a href="#">AE001439</a> |
| Helicobacter pylori Gambia94/24 [e-proteobacteria ]                                                   |       |         |                          |
| <a href="#">Helicobacter pylori Gambia94/24, complete genome</a>                                      | 97.1  | 2e-16   | <a href="#">CP002332</a> |
| Helicobacter pylori NCTC 11637 = CCUG 17874 = ATCC 43504 = JCM 12093 [e-proteobacteria ]              |       |         |                          |
| <a href="#">Helicobacter pylori strain NCTC11637 genome assembly, chromosome: 1</a>                   | 91.6  | 8e-15   | <a href="#">LS483488</a> |
| Helicobacter pylori SJM180 [e-proteobacteria ]                                                        |       |         |                          |
| <a href="#">Helicobacter pylori SJM180, complete genome</a>                                           | 91.6  | 8e-15   | <a href="#">CP002073</a> |
| Helicobacter pylori B38 [e-proteobacteria ]                                                           |       |         |                          |
| <a href="#">Helicobacter pylori B38 complete genome, strain B38</a>                                   | 91.6  | 8e-15   | <a href="#">FM991728</a> |
| Helicobacter pylori 2017 [e-proteobacteria ]                                                          |       |         |                          |
| <a href="#">Helicobacter pylori 2017, complete genome</a>                                             | 87.9  | 1e-13   | <a href="#">CP002571</a> |
| Helicobacter pylori 2018 [e-proteobacteria ]                                                          |       |         |                          |
| <a href="#">Helicobacter pylori 2018, complete genome</a>                                             | 87.9  | 1e-13   | <a href="#">CP002572</a> |
| Helicobacter pylori 908 [e-proteobacteria ]                                                           |       |         |                          |
| <a href="#">Helicobacter pylori 908, complete genome</a>                                              | 87.9  | 1e-13   | <a href="#">CP002184</a> |

## o Taxonomy

| Taxonomy                                                                                 | Number of hits     | Number of Organisms | Description                                                                               |
|------------------------------------------------------------------------------------------|--------------------|---------------------|-------------------------------------------------------------------------------------------|
| <a href="#">Helicobacter</a>                                                             | <a href="#">91</a> | 11                  |                                                                                           |
| .. <a href="#">Helicobacter pylori</a>                                                   | <a href="#">80</a> | 11                  | <a href="#">Helicobacter pylori hits</a>                                                  |
| ... <a href="#">Helicobacter pylori SS1</a>                                              | <a href="#">1</a>  | 1                   | <a href="#">Helicobacter pylori SS1 hits</a>                                              |
| ... <a href="#">Helicobacter pylori PMSS1</a>                                            | <a href="#">1</a>  | 1                   | <a href="#">Helicobacter pylori PMSS1 hits</a>                                            |
| ... <a href="#">Helicobacter pylori J99</a>                                              | <a href="#">2</a>  | 1                   | <a href="#">Helicobacter pylori J99 hits</a>                                              |
| ... <a href="#">Helicobacter pylori Gambia94/24</a>                                      | <a href="#">1</a>  | 1                   | <a href="#">Helicobacter pylori Gambia94/24 hits</a>                                      |
| ... <a href="#">Helicobacter pylori NCTC 11637 = CCUG 17874 = ATCC 43504 = JCM 12093</a> | <a href="#">1</a>  | 1                   | <a href="#">Helicobacter pylori NCTC 11637 = CCUG 17874 = ATCC 43504 = JCM 12093 hits</a> |
| ... <a href="#">Helicobacter pylori SJM180</a>                                           | <a href="#">1</a>  | 1                   | <a href="#">Helicobacter pylori SJM180 hits</a>                                           |
| ... <a href="#">Helicobacter pylori B38</a>                                              | <a href="#">1</a>  | 1                   | <a href="#">Helicobacter pylori B38 hits</a>                                              |
| ... <a href="#">Helicobacter pylori 908</a>                                              | <a href="#">1</a>  | 3                   | <a href="#">Helicobacter pylori 908 hits</a>                                              |
| ... <a href="#">Helicobacter pylori 2017</a>                                             | <a href="#">1</a>  | 1                   | <a href="#">Helicobacter pylori 2017 hits</a>                                             |
| ... <a href="#">Helicobacter pylori 2018</a>                                             | <a href="#">1</a>  | 1                   | <a href="#">Helicobacter pylori 2018 hits</a>                                             |
